# Supplementary material
Source: PubMed Central journal article supplement (PMC6430532)
Supplement: JVI.01784-18-s0001.pdf [file JVI.01784-18-s0001.pdf]

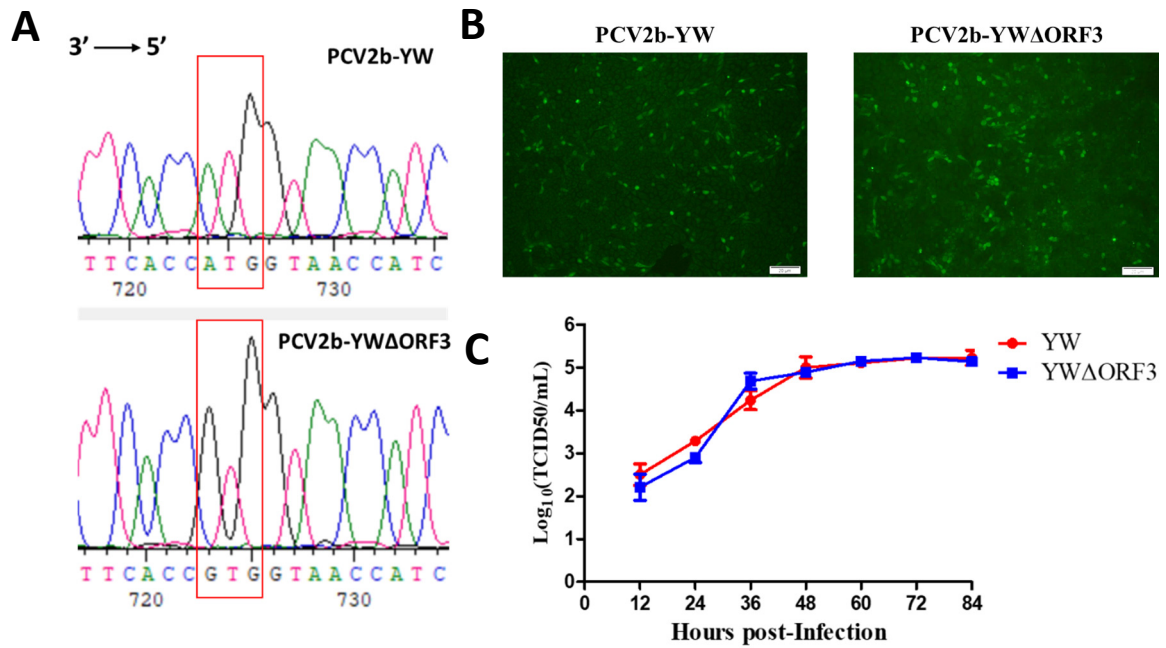

**Supplemental Figure 1: Growth characteristics of PCV2b-YW (YW) and its mutant strain PCV2b-YW ΔORF3 (ΔORF3).** (A) We constructed an ORF3-null mutant by mutating the ORF3 start codon from ATG to GTG to disrupt *orf3* expression. (B) Staining of YW and ΔORF3 for 48 hpi in PK-15 cells by indirect immunofluorescence assay (IFA). (C) Growth curves of YW and ΔORF3 were shown as TCID<sub>50</sub> at different time points. The mutant virus has similar growth characteristics to its parental virus.
